# Supplementary material for: Selective Noradrenaline Depletion in the Neocortex and Hippocampus Induces Working Memory Deficits and Regional Occurrence of Pathological Proteins
Source: MDPI journal article supplement (doi:10.3390/biology12091264), 2023-09-21
Supplement: s1 [file s1]

The loading order for the western blot of cortex (TDP-43, pTDP43, Tau and PTAU) is the following:

Gel 1:

1. CTL
2. LOW DOSE
3. HIGH DOSE
4. CTL
5. LOW DOSE
6. HIGH DOSE
7. CTL
8. LOW DOSE
9. HIGH DOSE
10. MARKER

Gel 2:

1. Marker
2. CTL
3. LD
4. HD
5. CTL
6. LD
7. HD
8. CTL
9. LD
10. CTL

The loading order for the western blot of Hippocampus (TDP-43, pTDP43, Tau and PTAU) is the following:

1. CTL
2. LOW DOSE
3. HIGH DOSE
4. CTL
5. LOW DOSE
6. HIGH DOSE
7. CTL
8. LOW DOSE
9. LOW DOSE
10. Marker
